# Supplementary material for: Identification of Circular RNA-Based Immunomodulatory Networks in Colorectal Cancer
Source: Front Oncol. 2022 Jan 27;11:779706. doi: 10.3389/fonc.2021.779706 (PMC8833313; doi:10.3389/fonc.2021.779706)
Supplement: Supplementary Table S3 — Expression levels of eight circular RNAs (circRNAs) in colorectal cancer (CRC) cells as detected by qRT-PCR assays. [file Table_3.xlsx]

## Sheet: hsa_circ_0000511
gene	cells	Cq	Cq mean	ΔCq	2^-ΔCq	2^-ΔCq mean	relative expression
hsa_circ_0000511	HT-29	26.07	13.22	12.85	0.000135445	4.99057e-06	27.1403
hsa_circ_0000511	HT-29	26.11	13.22	12.89	0.000131742		26.3982
hsa_circ_0000511	HT-29	26.09	13.22	12.87	0.000133581		26.7667
hsa_circ_0000511	HCT-116	25.45	13.19	12.26	0.000203879	4.99057e-06	40.8529
hsa_circ_0000511	HCT-116	25.42	13.19	12.23	0.000208163		41.7113
hsa_circ_0000511	HCT-116	25.45	13.19	12.26	0.000203879		40.8529
hsa_circ_0000511	NCM-460	28.25	10.9067	17.3433	6.01363e-06	4.99057e-06	1.205
hsa_circ_0000511	NCM-460	29	10.9067	18.0933	3.57572e-06		0.716497
hsa_circ_0000511	NCM-460	28.41	10.9067	17.5033	5.38235e-06		1.0785
hsa_circ_0000511	SW-480	26.93	12.1033	14.8267	3.44135e-05	4.99057e-06	6.89571
hsa_circ_0000511	SW-480	27.18	12.1033	15.0767	2.89382e-05		5.79858
hsa_circ_0000511	SW-480	26.97	12.1033	14.8667	3.34724e-05		6.70714
hsa_circ_0000511	SW-620	25.5	13.1567	12.3433	0.000192436	4.99057e-06	38.56
hsa_circ_0000511	SW-620	25.5	13.1567	12.3433	0.000192436		38.56
hsa_circ_0000511	SW-620	25.28	13.1567	12.1233	0.000224137		44.9121
hsa_circ_0000511	CACO-2	25.09	11.7733	13.3167	9.8013e-05	4.99057e-06	19.6397
hsa_circ_0000511	CACO-2	25.34	11.7733	13.5667	8.24188e-05		16.5149
hsa_circ_0000511	CACO-2	24.96	11.7733	13.1867	0.000107255		21.4916
hsa_circ_0000511	DLD-1	25.82	11.7867	14.0333	5.96411e-05	4.99057e-06	11.9508
hsa_circ_0000511	DLD-1	25.71	11.7867	13.9233	6.43664e-05		12.8976
hsa_circ_0000511	DLD-1	25.7	11.7867	13.9133	6.48141e-05		12.9873
gene	cells	Cq	Cq mean
GAPDH	HT-29	13.41	13.22
GAPDH	HT-29	13.27	13.22
GAPDH	HT-29	12.98	13.22
GAPDH	HCT-116	13.35	13.19
GAPDH	HCT-116	13.12	13.19
GAPDH	HCT-116	13.1	13.19
GAPDH	NCM-460	11.73	10.9067
GAPDH	NCM-460	9.17	10.9067
GAPDH	NCM-460	11.82	10.9067
GAPDH	SW-480	12.21	12.1033
GAPDH	SW-480	12.21	12.1033
GAPDH	SW-480	11.89	12.1033
GAPDH	SW-620	13.05	13.1567
GAPDH	SW-620	13.25	13.1567
GAPDH	SW-620	13.17	13.1567
GAPDH	CACO-2	11.95	11.7733
GAPDH	CACO-2	11.66	11.7733
GAPDH	CACO-2	11.71	11.7733
GAPDH	DLD-1	11.65	11.7867
GAPDH	DLD-1	11.7	11.7867
GAPDH	DLD-1	12.01	11.7867

## Sheet: hsa_circ_0000512
gene	cells	Cq	Cq mean	ΔCq	2^-ΔCq	2^-ΔCq mean	relative expression
hsa_circ_0000512	HCT-116	28.38	13.53	14.85	3.38614e-05	3.68475e-05	0.918959
hsa_circ_0000512	HCT-116	29.08	13.53	15.55	2.08441e-05		0.565686
hsa_circ_0000512	HCT-116	28.8	13.53	15.27	2.53088e-05		0.686853
hsa_circ_0000512	NCM-460	26.94	12.29	14.65	3.88965e-05	3.68475e-05	1.05561
hsa_circ_0000512	NCM-460	27.12	12.29	14.83	3.43341e-05		0.931787
hsa_circ_0000512	NCM-460	27	12.29	14.71	3.7312e-05		1.01261
hsa_circ_0000512	SW-480	30.26	12.73	17.53	5.28377e-06	3.68475e-05	0.143396
hsa_circ_0000512	SW-480	30.74	12.73	18.01	3.78835e-06		0.102811
hsa_circ_0000512	SW-480	30.02	12.73	17.29	6.2401e-06		0.169349
hsa_circ_0000512	SW-620	27.39	13.5867	13.8033	6.99492e-05	3.68475e-05	1.89834
hsa_circ_0000512	SW-620	26.92	13.5867	13.3333	9.68873e-05		2.62941
hsa_circ_0000512	SW-620	27.24	13.5867	13.6533	7.76135e-05		2.10634
hsa_circ_0000512	CACO-2	29.81	12.74	17.07	7.26805e-06	3.68475e-05	0.197247
hsa_circ_0000512	CACO-2	30.05	12.74	17.31	6.15419e-06		0.167018
hsa_circ_0000512	CACO-2	31.01	12.74	18.27	3.1636e-06		0.0858566
hsa_circ_0000512	DLD-1	30.32	12.2167	18.1033	3.55102e-06	3.68475e-05	0.0963708
hsa_circ_0000512	DLD-1	30.26	12.2167	18.0433	3.70182e-06		0.100463
hsa_circ_0000512	DLD-1	31.5	12.2167	19.2833	1.56725e-06		0.0425334
gene	cells	Cq	Cq mean
GAPDH	HCT-116	13.47	13.53
GAPDH	HCT-116	13.54	13.53
GAPDH	HCT-116	13.58	13.53
GAPDH	NCM-460	12.47	12.29
GAPDH	NCM-460	12.2	12.29
GAPDH	NCM-460	12.2	12.29
GAPDH	SW-480	12.9	12.73
GAPDH	SW-480	12.3	12.73
GAPDH	SW-480	12.99	12.73
GAPDH	SW-620	13.59	13.5867
GAPDH	SW-620	13.67	13.5867
GAPDH	SW-620	13.5	13.5867
GAPDH	CACO-2	12.8	12.74
GAPDH	CACO-2	12.82	12.74
GAPDH	CACO-2	12.6	12.74
GAPDH	DLD-1	12.32	12.2167
GAPDH	DLD-1	12.11	12.2167
GAPDH	DLD-1	12.22	12.2167

## Sheet: hsa_circ_0000514
gene	cells	Cq	Cq mean	ΔCq	2^-ΔCq	2^-ΔCq mean	relative expression
hsa_circ_0000514	HT-29	26.97	13.22	13.75	7.25834e-05	3.69622e-06	19.6372
hsa_circ_0000514	HT-29	26.18	13.22	12.96	0.000125502		33.9542
hsa_circ_0000514	HT-29	26.81	13.22	13.59	8.10965e-05		21.9404
hsa_circ_0000514	HCT-116	26.25	13.19	13.06	0.000117098	3.69622e-06	31.6804
hsa_circ_0000514	HCT-116	26.1	13.19	12.91	0.000129928		35.1516
hsa_circ_0000514	HCT-116	26.21	13.19	13.02	0.00012039		32.5711
hsa_circ_0000514	NCM-460	29.29	10.9067	18.3833	2.92459e-06	3.69622e-06	0.791239
hsa_circ_0000514	NCM-460	29.11	10.9067	18.2033	3.31322e-06		0.896382
hsa_circ_0000514	NCM-460	28.56	10.9067	17.6533	4.85084e-06		1.31238
hsa_circ_0000514	SW-480	27.59	12.1033	15.4867	2.17795e-05	3.69622e-06	5.89239
hsa_circ_0000514	SW-480	27.56	12.1033	15.4567	2.22372e-05		6.0162
hsa_circ_0000514	SW-480	27.56	12.1033	15.4567	2.22372e-05		6.0162
hsa_circ_0000514	SW-620	25.85	13.1567	12.6933	0.000150982	3.69622e-06	40.8478
hsa_circ_0000514	SW-620	26	13.1567	12.8433	0.000136073		36.8141
hsa_circ_0000514	SW-620	26.06	13.1567	12.9033	0.00013053		35.3144
hsa_circ_0000514	CACO-2	25.94	11.7733	14.1667	5.43761e-05	3.69622e-06	14.7113
hsa_circ_0000514	CACO-2	25.53	11.7733	13.7567	7.22488e-05		19.5467
hsa_circ_0000514	CACO-2	25.34	11.7733	13.5667	8.24188e-05		22.2981
hsa_circ_0000514	DLD-1	26.32	11.7867	14.5333	4.21726e-05	3.69622e-06	11.4097
hsa_circ_0000514	DLD-1	26.44	11.7867	14.6533	3.88067e-05		10.499
hsa_circ_0000514	DLD-1	26.42	11.7867	14.6333	3.93485e-05		10.6456
gene	cells	Cq	Cq mean
GAPDH	HT-29	13.41	13.22
GAPDH	HT-29	13.27	13.22
GAPDH	HT-29	12.98	13.22
GAPDH	HCT-116	13.35	13.19
GAPDH	HCT-116	13.12	13.19
GAPDH	HCT-116	13.1	13.19
GAPDH	NCM-460	11.73	10.9067
GAPDH	NCM-460	9.17	10.9067
GAPDH	NCM-460	11.82	10.9067
GAPDH	SW-480	12.21	12.1033
GAPDH	SW-480	12.21	12.1033
GAPDH	SW-480	11.89	12.1033
GAPDH	SW-620	13.05	13.1567
GAPDH	SW-620	13.25	13.1567
GAPDH	SW-620	13.17	13.1567
GAPDH	CACO-2	11.95	11.7733
GAPDH	CACO-2	11.66	11.7733
GAPDH	CACO-2	11.71	11.7733
GAPDH	DLD-1	11.65	11.7867
GAPDH	DLD-1	11.7	11.7867
GAPDH	DLD-1	12.01	11.7867

## Sheet: hsa_circ_0000515
gene	cells	Cq	Cq mean	ΔCq	2^-ΔCq	2^-ΔCq mean	relative expression
hsa_circ_0000515	SW-480	35.04	12.5867	22.4533	1.7413e-07	2.99081e-07	0.582217
hsa_circ_0000515	SW-480	33.77	12.5867	21.1833	4.19934e-07		1.40408
hsa_circ_0000515	SW-480	34.24	12.5867	21.6533	3.03178e-07		1.0137
hsa_circ_0000515	SW-620	31.06	13.8233	17.2367	6.4751e-06	2.99081e-07	21.65
hsa_circ_0000515	SW-620	30.58	13.8233	16.7567	9.0311e-06		30.1962
hsa_circ_0000515	SW-620	31.45	13.8233	17.6267	4.94134e-06		16.5218
hsa_circ_0000515	CACO-2	31.25	12.64	18.61	2.49938e-06	2.99081e-07	8.35687
hsa_circ_0000515	CACO-2	31.28	12.64	18.64	2.44794e-06		8.18489
hsa_circ_0000515	CACO-2	31.25	12.64	18.61	2.49938e-06		8.35687
gene	cells	Cq	Cq mean
GAPDH	SW-480	12.41	12.5867
GAPDH	SW-480	12.7	12.5867
GAPDH	SW-480	12.65	12.5867
GAPDH	SW-620	13.86	13.8233
GAPDH	SW-620	14.02	13.8233
GAPDH	SW-620	13.59	13.8233
GAPDH	CACO-2	13.39	12.64
GAPDH	CACO-2	13.13	12.64
GAPDH	CACO-2	11.4	12.64

## Sheet: hsa_circ_0000517
gene	cells	Cq	Cq mean	ΔCq	2^-ΔCq	2^-ΔCq mean	relative expression
hsa_circ_0000517	HCT-116	29.66	14.2567	15.4033	2.30746e-05	6.83073e-06	3.37806	3.49115
hsa_circ_0000517	HCT-116	30	14.2567	15.7433	1.82299e-05		2.66881
hsa_circ_0000517	HCT-116	29.27	14.2567	15.0133	3.02368e-05		4.42659
hsa_circ_0000517	NCM-460	30.83	13.7167	17.1133	7.05299e-06	6.83073e-06	1.03254	1
hsa_circ_0000517	NCM-460	30.88	13.7167	17.1633	6.81274e-06		0.997367
hsa_circ_0000517	NCM-460	30.92	13.7167	17.2033	6.62645e-06		0.970094
hsa_circ_0000517	SW-480	31.34	12.91	18.43	2.8315e-06	6.83073e-06	0.414525	0.476826
hsa_circ_0000517	SW-480	30.81	12.91	17.9	4.08849e-06		0.598544
hsa_circ_0000517	SW-480	31.33	12.91	18.42	2.8512e-06		0.417408
hsa_circ_0000517	SW-620	28.19	14.0033	14.1867	5.36275e-05	6.83073e-06	7.85093	7.40004
hsa_circ_0000517	SW-620	28.31	14.0033	14.3067	4.93474e-05		7.22433
hsa_circ_0000517	SW-620	28.33	14.0033	14.3267	4.8668e-05		7.12487
hsa_circ_0000517	CACO-2	28.96	13.55	15.41	2.29682e-05	6.83073e-06	3.36249	3.05457
hsa_circ_0000517	CACO-2	29	13.55	15.45	2.23402e-05		3.27054
hsa_circ_0000517	CACO-2	29.37	13.55	15.82	1.72864e-05		2.53069
hsa_circ_0000517	DLD-1	30.6	13.5467	17.0533	7.3525e-06	6.83073e-06	1.07639	0.765351
hsa_circ_0000517	DLD-1	31.9	13.5467	18.3533	2.98604e-06		0.437149
hsa_circ_0000517	DLD-1	31.06	13.5467	17.5133	5.34517e-06		0.782518
gene	cells	Cq	Cq mean
GAPDH	HCT-116	14.26	14.2567
GAPDH	HCT-116	14.17	14.2567
GAPDH	HCT-116	14.34	14.2567
GAPDH	NCM-460	13.83	13.7167
GAPDH	NCM-460	13.7	13.7167
GAPDH	NCM-460	13.62	13.7167
GAPDH	SW-480	12.95	12.91
GAPDH	SW-480	12.96	12.91
GAPDH	SW-480	12.82	12.91
GAPDH	SW-620	13.92	14.0033
GAPDH	SW-620	14.15	14.0033
GAPDH	SW-620	13.94	14.0033
GAPDH	CACO-2	13.56	13.55
GAPDH	CACO-2	13.56	13.55
GAPDH	CACO-2	13.53	13.55
GAPDH	DLD-1	13.69	13.5467
GAPDH	DLD-1	13.6	13.5467
GAPDH	DLD-1	13.35	13.5467

## Sheet: hsa_circ_0000518
gene	cells	Cq	Cq mean	ΔCq	2^-ΔCq	2^-ΔCq mean	relative expression
hsa_circ_0000518	HT-29	32.96	14.0233	18.9367	1.99295e-06	1.03011e-06	1.93469
hsa_circ_0000518	HT-29	33.02	14.0233	18.9967	1.91176e-06		1.85588
hsa_circ_0000518	HT-29	34.31	14.0233	20.2867	7.81816e-07		0.758964
hsa_circ_0000518	HCT-116	31.67	14.24	17.43	5.66301e-06	1.03011e-06	5.49748
hsa_circ_0000518	HCT-116	32.35	14.24	18.11	3.53465e-06		3.43134
hsa_circ_0000518	HCT-116	31.81	14.24	17.57	5.13929e-06		4.98907
hsa_circ_0000518	NCM-460	32.77	13.0067	19.7633	1.12368e-06	1.03011e-06	1.09084
hsa_circ_0000518	NCM-460	33.05	13.0067	20.0433	9.25455e-07		0.898404
hsa_circ_0000518	NCM-460	32.88	13.0067	19.8733	1.04119e-06		1.01076
hsa_circ_0000518	SW-480	34.26	13.5767	20.6833	5.93877e-07	1.03011e-06	0.576518
hsa_circ_0000518	SW-480	33.37	13.5767	19.7933	1.10056e-06		1.06839
hsa_circ_0000518	SW-480	34.21	13.5767	20.6333	6.1482e-07		0.596849
hsa_circ_0000518	SW-620	31.54	14.04	17.5	5.3948e-06	1.03011e-06	5.23711
hsa_circ_0000518	SW-620	31.51	14.04	17.47	5.50815e-06		5.34715
hsa_circ_0000518	SW-620	31.25	14.04	17.21	6.5959e-06		6.4031
hsa_circ_0000518	CACO-2	32.43	13.4667	18.9633	1.95645e-06	1.03011e-06	1.89926
hsa_circ_0000518	CACO-2	31.95	13.4667	18.4833	2.72874e-06		2.64898
hsa_circ_0000518	CACO-2	31.74	13.4667	18.2733	3.1563e-06		3.06404
hsa_circ_0000518	DLD-1	32.31	12.6867	19.6233	1.23819e-06	1.03011e-06	1.202
hsa_circ_0000518	DLD-1	33.56	12.6867	20.8733	5.20596e-07		0.505379
hsa_circ_0000518	DLD-1	33.04	12.6867	20.3533	7.46511e-07		0.724691
gene	cells	Cq	Cq mean
GAPDH	HT-29	14.06	14.0233
GAPDH	HT-29	14.07	14.0233
GAPDH	HT-29	13.94	14.0233
GAPDH	HCT-116	14.39	14.24
GAPDH	HCT-116	14.15	14.24
GAPDH	HCT-116	14.18	14.24
GAPDH	NCM-460	13.06	13.0067
GAPDH	NCM-460	13.07	13.0067
GAPDH	NCM-460	12.89	13.0067
GAPDH	SW-480	13.62	13.5767
GAPDH	SW-480	13.77	13.5767
GAPDH	SW-480	13.34	13.5767
GAPDH	SW-620	14.06	14.04
GAPDH	SW-620	14.03	14.04
GAPDH	SW-620	14.03	14.04
GAPDH	CACO-2	13.35	13.4667
GAPDH	CACO-2	13.49	13.4667
GAPDH	CACO-2	13.56	13.4667
GAPDH	DLD-1	13.16	12.6867
GAPDH	DLD-1	13.13	12.6867
GAPDH	DLD-1	11.77	12.6867

## Sheet: hsa_circ_0000519
gene	cells	Cq	Cq mean	ΔCq	2^-ΔCq	2^-ΔCq mean	relative expression
hsa_circ_0000519	HT-29	26.71	12.73	13.98	6.18872e-05	4.10149e-06	15.089
hsa_circ_0000519	HT-29	26.42	12.73	13.69	7.56658e-05		18.4484
hsa_circ_0000519	HT-29	26.51	12.73	13.78	7.10897e-05		17.3327
hsa_circ_0000519	HCT-116	26.25	12.6	13.65	7.7793e-05	4.10149e-06	18.967
hsa_circ_0000519	HCT-116	26.37	12.6	13.77	7.15842e-05		17.4532
hsa_circ_0000519	HCT-116	25.8	12.6	13.2	0.000106268		25.9097
hsa_circ_0000519	NCM-460	29.6	11.2133	18.3867	2.91784e-06	4.10149e-06	0.711411
hsa_circ_0000519	NCM-460	29.18	11.2133	17.9667	3.90386e-06		0.951816
hsa_circ_0000519	NCM-460	28.69	11.2133	17.4767	5.48276e-06		1.33677
hsa_circ_0000519	SW-480	26.72	11.3633	15.3567	2.38332e-05	4.10149e-06	5.81087
hsa_circ_0000519	SW-480	27.45	11.3633	16.0867	1.43691e-05		3.5034
hsa_circ_0000519	SW-480	27.05	11.3633	15.6867	1.89602e-05		4.62276
hsa_circ_0000519	SW-620	25.55	12.9633	12.5867	0.000162568	4.10149e-06	39.6364
hsa_circ_0000519	SW-620	25.44	12.9633	12.4767	0.000175448		42.7767
hsa_circ_0000519	SW-620	25.97	12.9633	13.0067	0.000121508		29.6252
hsa_circ_0000519	CACO-2	25.87	11.085	14.785	3.54219e-05	4.10149e-06	8.63635
hsa_circ_0000519	CACO-2	26.13	11.085	15.045	2.95804e-05		7.21211
hsa_circ_0000519	CACO-2	26.1	11.085	15.015	3.02019e-05		7.36365
hsa_circ_0000519	DLD-1	27.56	11.16	16.4	1.1564e-05	4.10149e-06	2.81946
hsa_circ_0000519	DLD-1	27.18	11.16	16.02	1.50487e-05		3.66909
hsa_circ_0000519	DLD-1	27.37	11.16	16.21	1.31918e-05		3.21634
gene	cells	Cq	Cq mean
GAPDH	HT-29	12.73	12.73
GAPDH	HT-29	12.37	12.73
GAPDH	HT-29	13.09	12.73
GAPDH	HCT-116	12.24	12.6
GAPDH	HCT-116	13.14	12.6
GAPDH	HCT-116	12.42	12.6
GAPDH	NCM-460	11.38	11.2133
GAPDH	NCM-460	11.04	11.2133
GAPDH	NCM-460	11.22	11.2133
GAPDH	SW-480	11.31	11.3633
GAPDH	SW-480	11.6	11.3633
GAPDH	SW-480	11.18	11.3633
GAPDH	SW-620	13.14	12.9633
GAPDH	SW-620	13.06	12.9633
GAPDH	SW-620	12.69	12.9633
GAPDH	CACO-2		11.085
GAPDH	CACO-2	11.06	11.085
GAPDH	CACO-2	11.11	11.085
GAPDH	DLD-1		11.16
GAPDH	DLD-1	11.16	11.16
GAPDH	DLD-1		11.16

## Sheet: hsa_circ_0000520
gene	cells	Cq	Cq mean	ΔCq	2^-ΔCq	2^-ΔCq mean	relative expression
hsa_circ_0000520	HT-29	32.17	13.7733	18.3967	2.89769e-06	1.35124e-06	2.14447
hsa_circ_0000520	HT-29	32.81	13.7733	19.0367	1.85948e-06		1.37613
hsa_circ_0000520	HT-29	33.06	13.7733	19.2867	1.56363e-06		1.15718
hsa_circ_0000520	HCT-116	31.93	14.1167	17.8133	4.34163e-06	1.35124e-06	3.21307
hsa_circ_0000520	HCT-116	31.18	14.1167	17.0633	7.30171e-06		5.40372
hsa_circ_0000520	HCT-116	31.44	14.1167	17.3233	6.09757e-06		4.51258
hsa_circ_0000520	NCM-460	32.36	12.9167	19.4433	1.40273e-06	1.35124e-06	1.0381
hsa_circ_0000520	NCM-460	32.47	12.9167	19.5533	1.29975e-06		0.961895
hsa_circ_0000520	NCM-460	30.64	12.9167	17.7233	4.6211e-06		3.41989	Abnormal Cq value (not analysis)
hsa_circ_0000520	SW-480	32.14	13.45	18.69	2.36455e-06	1.35124e-06	1.74992
hsa_circ_0000520	SW-480	32.92	13.45	19.47	1.37704e-06		1.01909
hsa_circ_0000520	SW-480	32.16	13.45	18.71	2.332e-06		1.72582
hsa_circ_0000520	SW-620	29.8	13.7167	16.0833	1.44024e-05	1.35124e-06	10.6586
hsa_circ_0000520	SW-620	30.16	13.7167	16.4433	1.12218e-05		8.30484
hsa_circ_0000520	SW-620	29.75	13.7167	16.0333	1.49103e-05		11.0345
hsa_circ_0000520	CACO-2	30.16	13.1733	16.9867	7.70023e-06	1.35124e-06	5.69864
hsa_circ_0000520	CACO-2	30.11	13.1733	16.9367	7.97178e-06		5.89961
hsa_circ_0000520	CACO-2	31.12	13.1733	17.9467	3.95836e-06		2.92943
hsa_circ_0000520	DLD-1	32.11	12.6433	19.4667	1.38022e-06	1.35124e-06	1.02145
hsa_circ_0000520	DLD-1	31.33	12.6433	18.6867	2.37002e-06		1.75396
hsa_circ_0000520	DLD-1	31.53	12.6433	18.8867	2.06323e-06		1.52691
gene	cells	Cq	Cq mean
GAPDH	HT-29	13.62	13.7733
GAPDH	HT-29	13.89	13.7733
GAPDH	HT-29	13.81	13.7733
GAPDH	HCT-116	14.12	14.1167
GAPDH	HCT-116	14.1	14.1167
GAPDH	HCT-116	14.13	14.1167
GAPDH	NCM-460	12.85	12.9167
GAPDH	NCM-460	13.02	12.9167
GAPDH	NCM-460	12.88	12.9167
GAPDH	SW-480	13.34	13.45
GAPDH	SW-480	13.49	13.45
GAPDH	SW-480	13.52	13.45
GAPDH	SW-620	13.58	13.7167
GAPDH	SW-620	13.76	13.7167
GAPDH	SW-620	13.81	13.7167
GAPDH	CACO-2	13.02	13.1733
GAPDH	CACO-2	13.29	13.1733
GAPDH	CACO-2	13.21	13.1733
GAPDH	DLD-1	12.78	12.6433
GAPDH	DLD-1	12	12.6433
GAPDH	DLD-1	13.15	12.6433
